# Supplementary material for: Influence of the diffusion-layer thickness during electrodeposition on the synthesis of nano core/shell Sn–O–C composite as an anode of lithium secondary batteries
Source: Royal Society of Chemistry journal article supplement (doi:10.1039/c4ra03435j), 2014-01-01
Supplement: c4ra03435j1.pdf [file c4ra03435j1.pdf]

## Supplementary Information

Influence of the diffusion-layer thickness during electrodeposition on the synthesis of  
the nano core/shell Sn-O-C composite as an anode of lithium secondary batteries

Moongook Jeong<sup>a</sup>, Tokihiko Yokoshima<sup>b</sup>, Hiroki Nara<sup>b</sup>, Toshiyuki Momma<sup>a,b</sup>, Tetsuya Osaka<sup>a,b,\*</sup>

<sup>a</sup> Graduate School of Advanced Science and Engineering, Waseda University

*3-4-1, Okubo, Shinjuku-ku, Tokyo 169-8555, Japan*

<sup>b</sup> Faculty of Science and Engineering, Waseda University

*3-4-1, Okubo, Shinjuku-ku, Tokyo 169-8555, Japan*

\*Corresponding author. Tel: +81-3-5286-3202, Fax: +81-3-3205-2074

e-mail: osakatets@waseda.jp

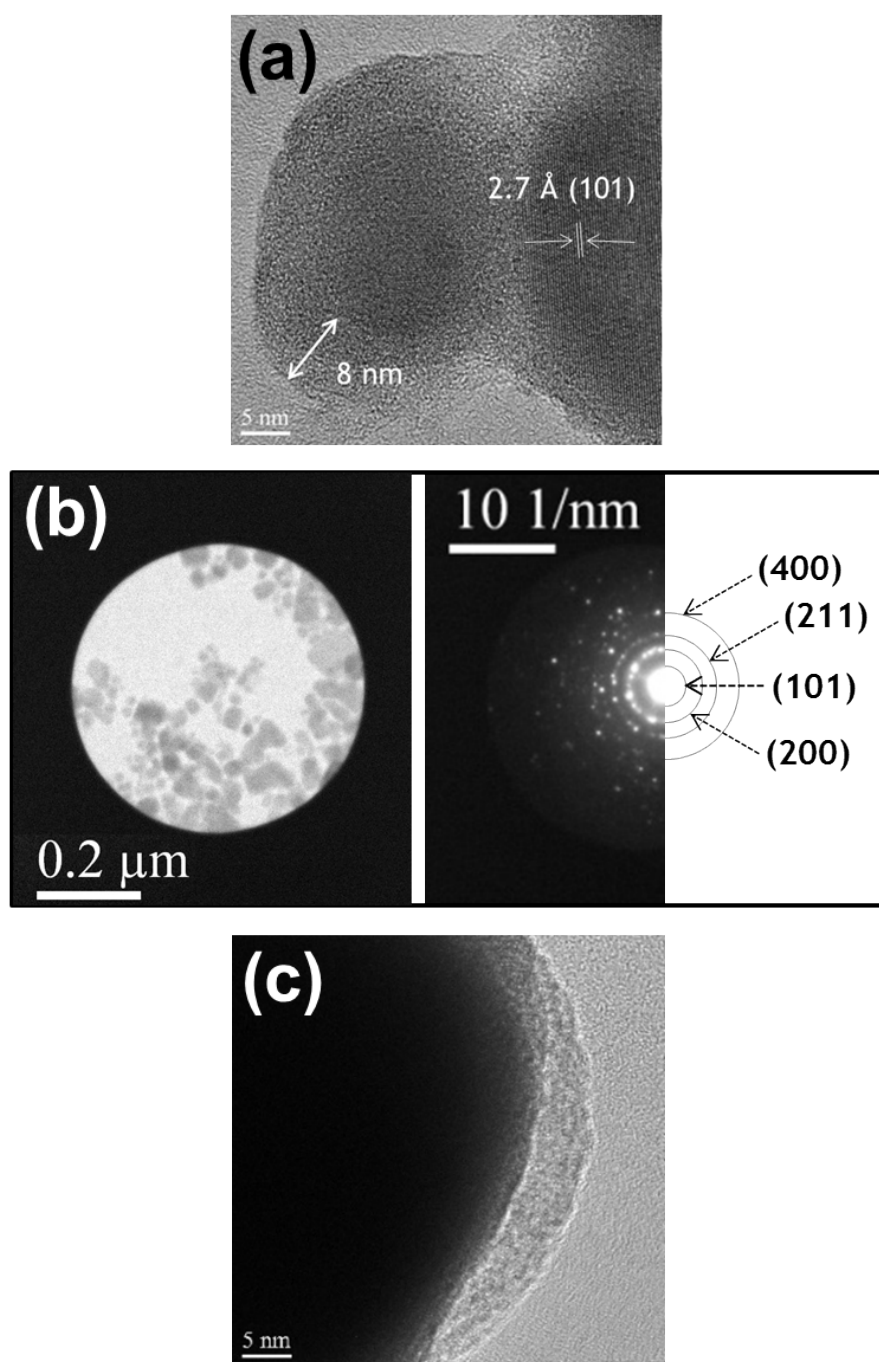

**Fig. S1.** (a) HR-TEM image, (b) selected area electron diffraction (SAED) pattern of the as-prepared Sn-O-C composite deposited with bath agitation, (c) HR-TEM image of the as-prepared Sn-O-C composite deposited without bath agitation.

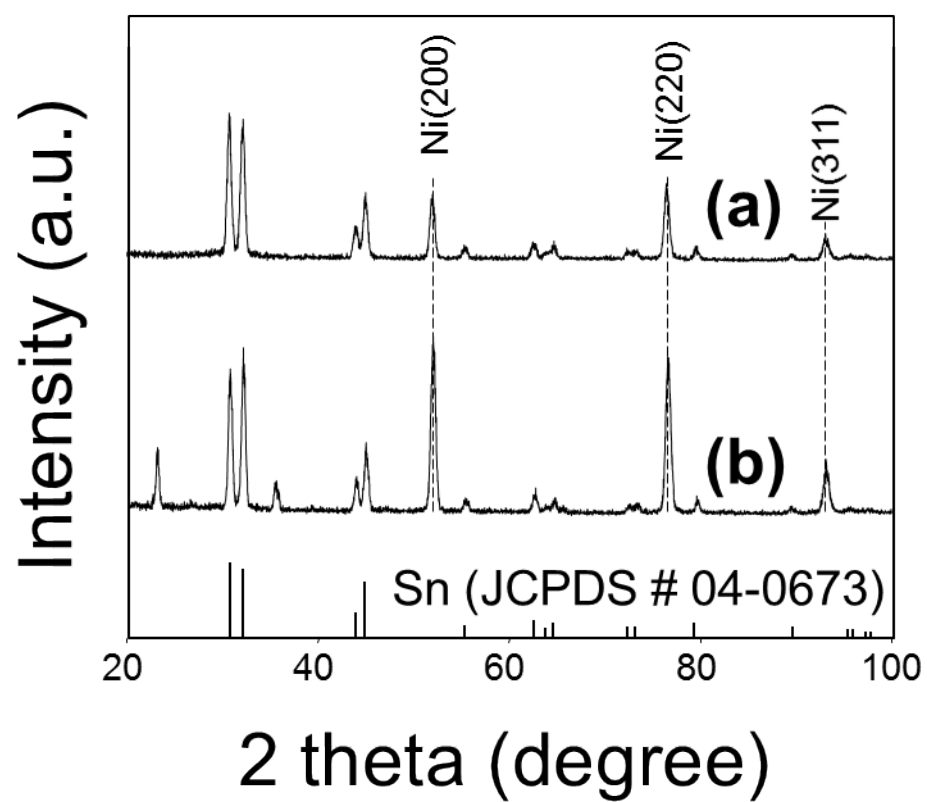

**Fig. S2.** GIXRD pattern of the as-prepared Sn-O-C composite deposited with (a) and without (b) bath agitation.

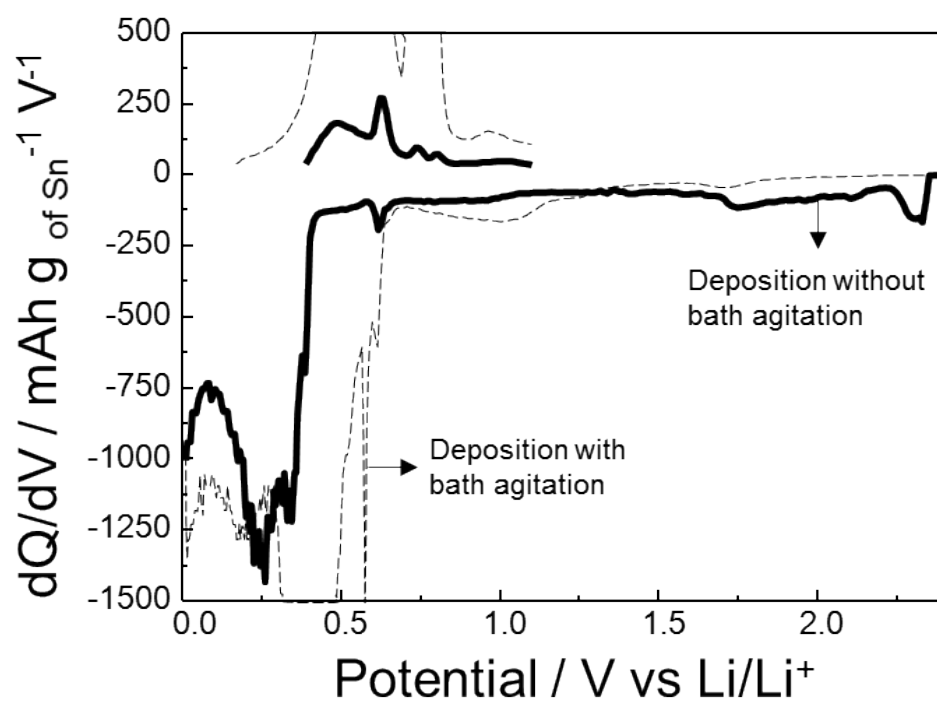

**Fig. S3.** DCPs of the 1st cycle with selected y axis range enlarged from Fig. 6d.

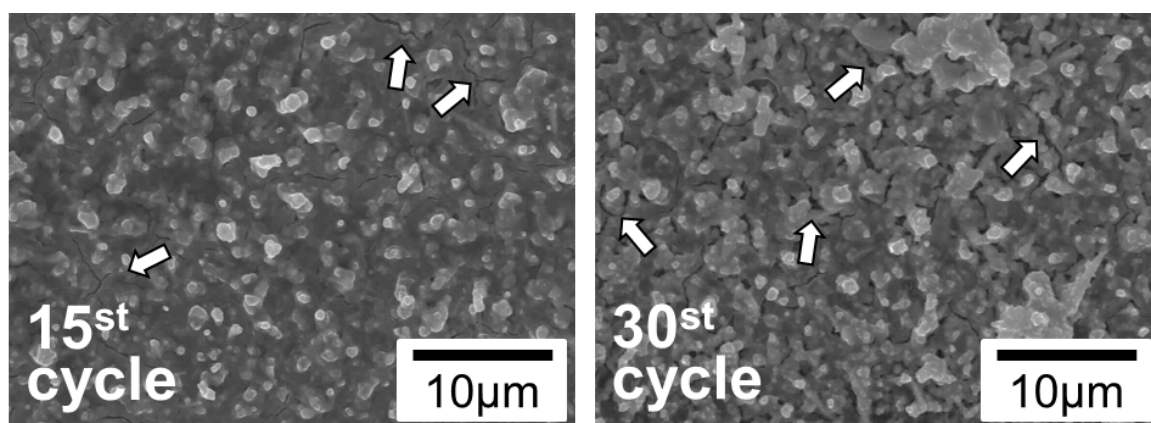

**Fig. S4.** FE-SEM images of the Sn-O-C composite deposited without bath agitation after several cycling.
